# Supplementary material
Source: publisher site journal article supplement (https://www.spandidos-publications.com/2713/downloadSupplementary)
Supplement: Supplementary file 1 [file downloadSupplementary]

## Sheet: TableS2
Table SII. Gene ontology enrichment terms.
	ID	Description	GeneRatio	BgRatio	pvalue	p.adjust	qvalue	geneID	Count
GO:0051235	GO:0051235	maintenance of location	25/548	286/17913	2.64773e-06	0.010012	0.00863397	81573/8291/3553/6280/3627/6373/2247/6646/5144/2201/7124/57120/3569/3638/4023/3309/7114/57584/402/5756/1649/114882/1407/80149/4792	25
GO:0033157	GO:0033157	regulation of intracellular protein transport	21/548	220/17913	4.25319e-06	0.010012	0.00863397	652/84455/4763/3998/3553/55677/7855/5594/127933/54543/29969/3638/10134/6845/3799/258010/784/23409/64328/80149/1263	21
GO:0043405	GO:0043405	regulation of MAP kinase activity	26/548	322/17913	7.14509e-06	0.011213	0.00966969	652/1647/4763/1991/57498/8491/3553/7855/5594/255324/2247/5997/5515/7124/11329/29969/10221/7046/257397/2074/1847/27250/1850/5795/1848/51347	26
GO:1905314	GO:1905314	semi-lunar valve development	8/548	37/17913	1.28593e-05	0.0151354	0.0130522	652/6662/2702/7042/2626/5925/54567/64220	8
GO:0071216	GO:0071216	cellular response to biotic stimulus	19/548	206/17913	1.96861e-05	0.0177941	0.0153449	9572/7538/10018/3553/7855/5594/57088/3627/5144/7124/3569/10221/3309/27250/9646/834/1649/80149/4792	19
GO:0007050	GO:0007050	cell cycle arrest	20/548	231/17913	3.00743e-05	0.0202271	0.0174431	7023/1647/672/23645/127933/323/133746/3659/5325/7042/55904/4824/94241/7046/5526/51147/1649/5925/440275/1263	20
GO:0034330	GO:0034330	cell junction organization	22/548	277/17913	4.59912e-05	0.0247781	0.0213677	1003/125111/3861/389/2702/3987/8502/7855/1525/9922/5584/9076/3673/7124/7042/7046/5795/402/5962/4035/10391/4649	22
GO:0000077	GO:0000077	DNA damage checkpoint	14/548	133/17913	5.78929e-05	0.0247781	0.0213677	1647/672/84126/5884/5325/5591/51322/57646/1407/51347/1112/440275/1263/641	14
GO:0048143	GO:0048143	astrocyte activation	6/548	24/17913	6.70779e-05	0.0263169	0.0226947	9572/3949/3553/7124/3569/4035	6
GO:0045662	GO:0045662	negative regulation of myoblast differentiation	6/548	25/17913	8.59924e-05	0.0272867	0.023531	652/6662/3627/10011/7124/1649	6
GO:0051607	GO:0051607	defense response to virus	19/548	231/17913	9.42274e-05	0.0272867	0.023531	79132/8780/5366/282616/282618/91543/3553/3627/3600/3659/3569/56829/10084/2074/3665/29110/4939/80149/440275	19
GO:0002521	GO:0002521	leukocyte differentiation	31/548	485/17913	9.68977e-05	0.0272867	0.023531	652/8651/4763/1435/282618/634/3589/91543/6654/7855/9759/9935/3976/112616/1230/4286/604/3600/3659/7124/4179/3569/5591/10221/1316/3665/5795/80149/5925/10202/54567	31
GO:0031570	GO:0031570	DNA integrity checkpoint	14/548	141/17913	0.000109399	0.0272867	0.023531	1647/672/84126/5884/5325/5591/51322/57646/1407/51347/1112/440275/1263/641	14
GO:0032103	GO:0032103	positive regulation of response to external stimulus	23/548	315/17913	0.000112641	0.0272867	0.023531	26471/79132/3949/1435/8291/3553/6280/1230/26060/8723/3627/2247/3600/3673/7124/3569/4023/7114/6845/27250/4035/29110/4792	23
GO:0009067	GO:0009067	aspartate family amino acid biosynthetic process	5/548	17/17913	0.000119965	0.0272867	0.023531	55256/5352/440/4507/4548	5
GO:0000075	GO:0000075	cell cycle checkpoint	17/548	197/17913	0.000121712	0.0272867	0.023531	1647/672/10403/84126/5884/7272/5325/5591/51322/57646/1407/51347/5925/1112/440275/1263/641	17
GO:0031331	GO:0031331	positive regulation of cellular catabolic process	24/548	341/17913	0.000141467	0.0287651	0.0248059	26471/9810/3949/7538/10018/3553/9567/7124/3569/54543/56829/94241/10221/116224/11040/10134/51322/258010/5962/4035/29110/80149/440275/1263	24
GO:0002683	GO:0002683	negative regulation of immune system process	29/548	451/17913	0.000145949	0.0287651	0.0248059	652/8651/4763/9572/79132/6662/8780/3949/407013/9466/282618/7538/634/9935/26060/604/3659/7124/7042/10457/5591/10221/1831/60343/9646/55366/5795/80149/4792	29
GO:0009615	GO:0009615	response to virus	23/548	323/17913	0.000163233	0.0287651	0.0248059	79132/8780/5366/282616/282618/91543/10018/3553/3627/3600/9213/3659/7124/3569/56829/11040/10084/2074/3665/29110/4939/80149/440275	23
GO:0071219	GO:0071219	cellular response to molecule of bacterial origin	16/548	183/17913	0.00016435	0.0287651	0.0248059	9572/7538/3553/7855/5594/57088/3627/5144/7124/3569/10221/27250/9646/834/80149/4792	16
GO:0003179	GO:0003179	heart valve morphogenesis	8/548	52/17913	0.000167549	0.0287651	0.0248059	652/6662/2702/7042/2626/5925/54567/64220	8
GO:0045444	GO:0045444	fat cell differentiation	18/548	222/17913	0.000171075	0.0287651	0.0248059	8651/7041/9572/7538/3589/8291/4929/25836/5997/7124/3569/3638/4023/1052/406/1649/114882/80149	18
GO:0009896	GO:0009896	positive regulation of catabolic process	26/548	392/17913	0.00019616	0.030784	0.026547	26471/9810/6662/3949/7538/10018/3553/9567/7124/3569/54543/56829/64321/94241/10221/116224/11040/10134/51322/258010/5962/4035/29110/80149/440275/1263	26
GO:0060252	GO:0060252	positive regulation of glial cell proliferation	5/548	19/17913	0.00021428	0.0315989	0.0272497	3553/5584/7124/23376/3569	5
GO:1902105	GO:1902105	regulation of leukocyte differentiation	20/548	267/17913	0.000221487	0.0315989	0.0272497	652/8651/4763/1435/282618/634/6654/9935/3976/1230/4286/604/3600/3659/7124/4179/10221/3665/80149/5925	20
GO:0046822	GO:0046822	regulation of nucleocytoplasmic transport	11/548	100/17913	0.000240373	0.0332846	0.0287034	652/84455/4763/3553/55677/5594/127933/22916/29969/64328/80149	11
GO:0050729	GO:0050729	positive regulation of inflammatory response	14/548	153/17913	0.000259456	0.0349006	0.0300969	26471/3949/3553/6280/26060/8723/3600/3673/7124/3569/4023/6845/27250/4792	14
GO:0001819	GO:0001819	positive regulation of cytokine production	28/548	446/17913	0.000279827	0.035017	0.0301973	22861/84282/79132/672/8780/1991/9466/282618/91543/3553/7855/26060/3600/5144/3659/7124/4179/3569/2626/4023/5591/10084/3665/5795/834/4035/1649/29110	28
GO:0051348	GO:0051348	negative regulation of transferase activity	20/548	272/17913	0.000282635	0.035017	0.0301973	652/7023/8651/1647/4763/407013/7538/634/3553/55861/5997/5515/11329/10221/27250/1850/5795/1848/51347/5925	20
GO:1904950	GO:1904950	negative regulation of establishment of protein localization	16/548	193/17913	0.000301708	0.0364216	0.0314086	4763/3998/407013/9466/91543/3553/7124/57120/29969/3638/7114/258010/55366/23409/80149/10391	16
GO:0043525	GO:0043525	positive regulation of neuron apoptotic process	8/548	57/17913	0.000321839	0.0375456	0.0323779	26471/4763/10018/9759/7124/7042/842/1649	8
GO:0043087	GO:0043087	regulation of GTPase activity	26/548	410/17913	0.000392704	0.0429965	0.0370785	85440/4763/8787/7813/396/9411/8853/6654/3987/8502/65078/9922/604/132864/5997/51520/11033/10565/9712/1121/57584/402/5962/64786/23348/4649	26
GO:0003158	GO:0003158	endothelium development	12/548	124/17913	0.000422713	0.0452303	0.0390049	652/1003/634/2702/3553/9076/3627/5144/7124/64321/5962/54567	12
GO:0010212	GO:0010212	response to ionizing radiation	13/548	144/17913	0.000485328	0.0475167	0.0409766	1647/3861/672/1789/3627/25836/5591/3309/2074/57646/10635/64782/641	13
GO:0045073	GO:0045073	regulation of chemokine biosynthetic process	4/548	13/17913	0.000497016	0.0475167	0.0409766	1991/3553/7124/3569	4
GO:0048844	GO:0048844	artery morphogenesis	9/548	76/17913	0.000505932	0.0475167	0.0409766	652/4763/3949/2702/7042/7046/4035/54567/64220	9
GO:0042303	GO:0042303	molting cycle	11/548	109/17913	0.000508956	0.0475167	0.0409766	4763/3861/6662/6654/25836/7124/7042/8323/406/55366/60529	11
GO:0042633	GO:0042633	hair cycle	11/548	109/17913	0.000508956	0.0475167	0.0409766	4763/3861/6662/6654/25836/7124/7042/8323/406/55366/60529	11
GO:0120163	GO:0120163	negative regulation of cold-induced thermogenesis	7/548	47/17913	0.000524823	0.0475167	0.0409766	85440/9572/3600/406/55366/1649/5925	7
GO:0038034	GO:0038034	signal transduction in absence of ligand	8/548	62/17913	0.000576236	0.048445	0.0417771	51741/4763/10018/3553/26060/7124/842/5519	8
GO:0097192	GO:0097192	extrinsic apoptotic signaling pathway in absence of ligand	8/548	62/17913	0.000576236	0.048445	0.0417771	51741/4763/10018/3553/26060/7124/842/5519	8
